# Supplementary material for: Relative Conservation Status of Bird Orders With Special Attention to Raptors
Source: Frontiers journal article supplement (doi:10.3389/fevo.2020.593941), 2020-11-27
Supplement: Table_1.XLSX [file Table_1.XLSX]

## Sheet: Sheet1
Alphabetical ID	Order Name	Threatened	Declining	Group	Num. Species
NA	AVERAGE	0.135693	0.464871	NA	305.22
1	ACCIPITRIFORMES	0.219343	0.603444	Raptor	234
2	ANSERIFORMES	0.182282	0.496122	Non-raptor	169
3	BUCEROTIFORMES	0.331699	0.836404	Non-raptor	72
4	CAPRIMULGIFORMES	0.0935291	0.397523	Non-raptor	596
5	CARIAMIFORMES	0.000501754	0.000623735	Raptor	2
6	CATHARTIFORMES	0.113015	0.423818	Raptor	7
7	CHARADRIIFORMES	0.134823	0.453545	Non-raptor	377
8	CICONIIFORMES	0.293205	0.604082	Non-raptor	20
9	COLIIFORMES	0.00029959	0.134368	Non-raptor	6
10	COLUMBIFORMES	0.203881	0.545987	Non-raptor	353
11	CORACIIFORMES	0.109639	0.5582	Non-raptor	188
12	CUCULIFORMES	0.0719911	0.430429	Non-raptor	149
13	EURYPYGIFORMES	0.490938	0.999454	Non-raptor	2
14	FALCONIFORMES	0.105919	0.452475	Raptor	64
15	GALLIFORMES	0.256809	0.740378	Non-raptor	307
16	GAVIIFORMES	0.000289479	0.613304	Non-raptor	5
17	GRUIFORMES	0.295857	0.490595	Non-raptor	169
18	LEPTOSOMIFORMES	0.00126681	0.998825	Non-raptor	1
19	MESITORNITHIFORMES	0.999592	0.999518	Non-raptor	3
20	MUSOPHAGIFORMES	0.072445	0.37408	Non-raptor	24
21	OPISTHOCOMIFORMES	0.0010571	0.998621	Non-raptor	1
22	OTIDIFORMES	0.301444	0.697415	Non-raptor	26
23	PASSERIFORMES	0.103775	0.420874	Non-raptor	6599
24	PELECANIFORMES	0.163595	0.431066	Non-raptor	109
25	PHAETHONTIFORMES	0.000464885	0.708704	Non-raptor	3
26	PHOENICOPTERIFORMES	0.133579	0.314209	Non-raptor	6
27	PICIFORMES	0.0698275	0.525893	Non-raptor	483
28	PODICIPEDIFORMES	0.243611	0.499738	Non-raptor	20
29	PROCELLARIIFORMES	0.46888	0.530507	Non-raptor	145
30	PSITTACIFORMES	0.292552	0.578126	Non-raptor	403
31	PTEROCLIFORMES	0.000128666	0.238947	Non-raptor	16
32	SPHENISCIFORMES	0.556692	0.615543	Non-raptor	18
33	STRIGIFORMES	0.192622	0.568057	Raptor	238
34	STRUTHIONIFORMES	0.192722	0.790207	Non-raptor	61
35	SULIFORMES	0.282131	0.452539	Non-raptor	53
36	TROGONIFORMES	0.0170317	0.581848	Non-raptor	43
